# Supplementary material
Source: publisher figshare collection journal article supplement (https://acs.figshare.com/ndownloader/files/4587031)
Supplement: Supplementary file 1 [file 4587031]

  
data_park2

  
_audit_creation_method            SHELXL-97 
_chemical_name_systematic 
; 
 ? 
; 
_chemical_name_common             ? 
_chemical_melting_point           ? 
_chemical_formula_moiety          ? 
_chemical_formula_sum 
 'C24 H19 Br N2 O2' 
_chemical_formula_weight          447.32 
  
loop_ 
 _atom_type_symbol 
 _atom_type_description 
 _atom_type_scat_dispersion_real 
 _atom_type_scat_dispersion_imag 
 _atom_type_scat_source 
 'C'  'C'   0.0033   0.0016 
 'International Tables Vol C Tables 4.2.6.8 and 6.1.1.4' 
 'H'  'H'   0.0000   0.0000 
 'International Tables Vol C Tables 4.2.6.8 and 6.1.1.4' 
 'N'  'N'   0.0061   0.0033 
 'International Tables Vol C Tables 4.2.6.8 and 6.1.1.4' 
 'O'  'O'   0.0106   0.0060 
 'International Tables Vol C Tables 4.2.6.8 and 6.1.1.4' 
 'Br'  'Br'  -0.2901   2.4595 
 'International Tables Vol C Tables 4.2.6.8 and 6.1.1.4' 
  
_symmetry_cell_setting            Monoclinic 
_symmetry_space_group_name_H-M    Ia 
  
loop_ 
 _symmetry_equiv_pos_as_xyz 
 'x, y, z' 
 'x+1/2, -y, z' 
 'x+1/2, y+1/2, z+1/2' 
 'x+1, -y+1/2, z+1/2' 
  
_cell_length_a                    19.979(5) 
_cell_length_b                    9.253(2) 
_cell_length_c                    24.348(8) 
_cell_angle_alpha                 90.00 
_cell_angle_beta                  111.914(5) 
_cell_angle_gamma                 90.00 
_cell_volume                      4176(2) 
_cell_formula_units_Z             8 
_cell_measurement_temperature     293(2) 
_cell_measurement_reflns_used     922 
_cell_measurement_theta_min       2.20 
_cell_measurement_theta_max       17.54 
  
_exptl_crystal_description        'block' 
_exptl_crystal_colour             'colorless' 
_exptl_crystal_size_max           0.15 
_exptl_crystal_size_mid           0.10 
_exptl_crystal_size_min           0.10 
_exptl_crystal_density_meas       'not measured' 
_exptl_crystal_density_diffrn     1.423 
_exptl_crystal_density_method     'not measured' 
_exptl_crystal_F_000              1824 
_exptl_absorpt_coefficient_mu     1.991 
_exptl_absorpt_correction_type    none 
_exptl_absorpt_correction_T_min   ? 
_exptl_absorpt_correction_T_max   ? 
_exptl_absorpt_process_details    ? 
  
_exptl_special_details 
; 
 ? 
; 
  
_diffrn_ambient_temperature       293(2) 
_diffrn_radiation_wavelength      0.71073 
_diffrn_radiation_type            MoK\a 
_diffrn_radiation_source          'fine-focus sealed tube' 
_diffrn_radiation_monochromator   graphite 
_diffrn_measurement_device_type   'CCD area detector' 
_diffrn_measurement_method        'phi and omega scans' 
_diffrn_detector_area_resol_mean  ? 
_diffrn_standards_number          ? 
_diffrn_standards_interval_count  ? 
_diffrn_standards_interval_time   ? 
_diffrn_standards_decay_%         ? 
_diffrn_reflns_number             11279 
_diffrn_reflns_av_R_equivalents   0.1249 
_diffrn_reflns_av_sigmaI/netI     0.2803 
_diffrn_reflns_limit_h_min        -24 
_diffrn_reflns_limit_h_max        21 
_diffrn_reflns_limit_k_min        -11 
_diffrn_reflns_limit_k_max        10 
_diffrn_reflns_limit_l_min        -27 
_diffrn_reflns_limit_l_max        30 
_diffrn_reflns_theta_min          1.80 
_diffrn_reflns_theta_max          26.00 
_reflns_number_total              6249 
_reflns_number_gt                 1929 
_reflns_threshold_expression      >2sigma(I) 
  
_computing_data_collection        'Bruker SMART' 
_computing_cell_refinement        'Bruker SMART' 
_computing_data_reduction         'Bruker SAINT' 
_computing_structure_solution     'SHELXS-97 (Sheldrick, 1990)' 
_computing_structure_refinement   'SHELXL-97 (Sheldrick, 1997)' 
_computing_molecular_graphics     'Bruker SHELXTL' 
_computing_publication_material   'Bruker SHELXTL' 
  
_refine_special_details 
; 
 Refinement of F^2^ against ALL reflections.  The weighted R-factor wR and 
 goodness of fit S are based on F^2^, conventional R-factors R are based 
 on F, with F set to zero for negative F^2^. The threshold expression of 
 F^2^ > 2sigma(F^2^) is used only for calculating R-factors(gt) etc. and is 
 not relevant to the choice of reflections for refinement.  R-factors based 
 on F^2^ are statistically about twice as large as those based on F, and R- 
 factors based on ALL data will be even larger. 
; 
  
_refine_ls_structure_factor_coef  Fsqd 
_refine_ls_matrix_type            full 
_refine_ls_weighting_scheme       calc 
_refine_ls_weighting_details 
 'calc w=1/[\s^2^(Fo^2^)+(0.0682P)^2^+0.0000P] where P=(Fo^2^+2Fc^2^)/3' 
_atom_sites_solution_primary      direct 
_atom_sites_solution_secondary    difmap 
_atom_sites_solution_hydrogens    geom 
_refine_ls_hydrogen_treatment     mixed 
_refine_ls_extinction_method      none 
_refine_ls_extinction_coef        ? 
_refine_ls_abs_structure_details 
 'Flack H D (1983), Acta Cryst. A39, 876-881' 
_refine_ls_abs_structure_Flack    0.00 
_refine_ls_number_reflns          6249 
_refine_ls_number_parameters      449 
_refine_ls_number_restraints      130 
_refine_ls_R_factor_all           0.1664 
_refine_ls_R_factor_gt            0.0643 
_refine_ls_wR_factor_ref          0.1643 
_refine_ls_wR_factor_gt           0.1482 
_refine_ls_goodness_of_fit_ref    0.669 
_refine_ls_restrained_S_all       0.663 
_refine_ls_shift/su_max           0.006 
_refine_ls_shift/su_mean          0.001 
  
loop_ 
 _atom_site_label 
 _atom_site_type_symbol 
 _atom_site_fract_x 
 _atom_site_fract_y 
 _atom_site_fract_z 
 _atom_site_U_iso_or_equiv 
 _atom_site_adp_type 
 _atom_site_occupancy 
 _atom_site_symmetry_multiplicity 
 _atom_site_calc_flag 
 _atom_site_refinement_flags 
 _atom_site_disorder_assembly 
 _atom_site_disorder_group 
Br1 Br 0.34307(11) 1.1060(3) 0.46380(8) 0.0766(11) Uani 1 1 d . . . 
Br2 Br 0.83526(12) 1.1075(4) 0.99052(8) 0.0861(12) Uani 1 1 d . . . 
N11 N 0.4994(8) 0.5367(17) 0.6514(7) 0.021(4) Uani 1 1 d D . . 
H11N H 0.516(5) 0.439(4) 0.654(4) 0.025 Uiso 1 1 d D . . 
N12 N 0.5303(10) 1.2387(18) 0.6492(9) 0.045(6) Uani 1 1 d . . . 
N21 N 0.6839(10) 0.540(2) 0.8087(8) 0.038(5) Uani 1 1 d DU . . 
H21N H 0.663(6) 0.455(7) 0.818(4) 0.045 Uiso 1 1 d D . . 
N22 N 0.6460(9) 1.2321(19) 0.8048(9) 0.032(5) Uani 1 1 d U . . 
O11 O 0.3279(8) 0.7466(16) 0.6853(7) 0.051(5) Uani 1 1 d . . . 
O12 O 0.2615(7) 0.9864(16) 0.6749(6) 0.043(4) Uani 1 1 d U . . 
H12 H 0.2735 0.9036 0.6865 0.064 Uiso 1 1 calc R . . 
O21 O 0.8476(7) 0.7441(14) 0.7708(6) 0.033(4) Uani 1 1 d . . . 
O22 O 0.9223(9) 0.982(2) 0.7874(7) 0.067(5) Uani 1 1 d U . . 
H22 H 0.9281 0.8950 0.7847 0.100 Uiso 1 1 calc R . . 
C11 C 0.4314(10) 0.567(2) 0.6526(9) 0.019(5) Uani 1 1 d U . . 
C12 C 0.4237(10) 0.718(2) 0.6489(9) 0.027(5) Uani 1 1 d U . . 
C13 C 0.4894(10) 0.779(2) 0.6431(8) 0.026(5) Uani 1 1 d U . . 
C14 C 0.5295(11) 0.665(2) 0.6471(10) 0.023(5) Uani 1 1 d U . . 
C15 C 0.3806(12) 0.446(2) 0.6540(10) 0.054(7) Uani 1 1 d . . . 
H15A H 0.3767 0.3767 0.6235 0.081 Uiso 1 1 calc R . . 
H15B H 0.3339 0.4849 0.6476 0.081 Uiso 1 1 calc R . . 
H15C H 0.3993 0.3985 0.6919 0.081 Uiso 1 1 calc R . . 
C16 C 0.3621(11) 0.792(2) 0.6519(10) 0.026(5) Uani 1 1 d U . . 
C17 C 0.3313(11) 0.922(2) 0.6146(10) 0.027(6) Uani 1 1 d U . . 
C18 C 0.3485(11) 0.951(2) 0.5665(10) 0.033(6) Uani 1 1 d U . . 
H18 H 0.3791 0.8906 0.5560 0.040 Uiso 1 1 calc R . . 
C19 C 0.3177(11) 1.076(2) 0.5331(8) 0.034(6) Uani 1 1 d . . . 
C21 C 0.7456(12) 0.569(2) 0.8029(10) 0.037(6) Uani 1 1 d . . . 
C22 C 0.7519(11) 0.723(2) 0.8025(8) 0.022(5) Uani 1 1 d . . . 
C23 C 0.6876(10) 0.775(2) 0.8064(8) 0.020(5) Uani 1 1 d U . . 
C24 C 0.6400(12) 0.661(2) 0.8089(9) 0.028(5) Uani 1 1 d . . . 
C25 C 0.7993(10) 0.459(2) 0.8042(9) 0.026(5) Uani 1 1 d U . . 
H25A H 0.7978 0.4435 0.7648 0.039 Uiso 1 1 calc R . . 
H25B H 0.7885 0.3704 0.8196 0.039 Uiso 1 1 calc R . . 
H25C H 0.8465 0.4918 0.8291 0.039 Uiso 1 1 calc R . . 
C26 C 0.8168(12) 0.788(2) 0.8010(10) 0.032(6) Uani 1 1 d . . . 
C27 C 0.8476(11) 0.921(2) 0.8391(10) 0.032(6) Uani 1 1 d . . . 
C28 C 0.8296(11) 0.953(2) 0.8893(9) 0.031(6) Uani 1 1 d . . . 
H28 H 0.8001 0.8882 0.8991 0.038 Uiso 1 1 calc R . . 
C29 C 0.8540(13) 1.075(2) 0.9243(11) 0.050(7) Uani 1 1 d . . . 
C110 C 0.2783(13) 1.170(3) 0.5490(11) 0.064(8) Uani 1 1 d . . . 
H110 H 0.2642 1.2561 0.5285 0.077 Uiso 1 1 calc R . . 
C111 C 0.2580(13) 1.138(3) 0.5965(12) 0.047(7) Uani 1 1 d U . . 
H111 H 0.2264 1.2005 0.6050 0.056 Uiso 1 1 calc R . . 
C112 C 0.2836(11) 1.017(3) 0.6316(10) 0.040(6) Uani 1 1 d . . . 
C113 C 0.5104(11) 0.936(2) 0.6482(10) 0.029(6) Uani 1 1 d . . . 
C114 C 0.4989(9) 1.025(2) 0.6910(9) 0.020(5) Uani 1 1 d U . . 
H114 H 0.4845 0.9847 0.7199 0.024 Uiso 1 1 calc R . . 
C115 C 0.5093(11) 1.170(3) 0.6894(11) 0.035(6) Uani 1 1 d U . . 
H115 H 0.5014 1.2264 0.7180 0.042 Uiso 1 1 calc R . . 
C116 C 0.5418(11) 1.152(2) 0.6115(11) 0.032(5) Uani 1 1 d U . . 
H116 H 0.5566 1.1951 0.5834 0.039 Uiso 1 1 calc R . . 
C117 C 0.5345(10) 1.002(2) 0.6085(9) 0.026(5) Uani 1 1 d U . . 
H117 H 0.5455 0.9487 0.5806 0.031 Uiso 1 1 calc R . . 
C118 C 0.6074(11) 0.658(3) 0.6479(10) 0.042(7) Uani 1 1 d U . . 
H11A H 0.6237 0.7569 0.6471 0.051 Uiso 1 1 calc R . . 
H11B H 0.6381 0.6165 0.6854 0.051 Uiso 1 1 calc R . . 
C119 C 0.6196(6) 0.5739(10) 0.5980(3) 0.023(5) Uiso 1 1 d G . . 
C120 C 0.5793(4) 0.6092(8) 0.5394(4) 0.044(4) Uiso 1 1 d G . . 
H120 H 0.5440 0.6805 0.5308 0.053 Uiso 1 1 calc R . . 
C121 C 0.5915(5) 0.5378(10) 0.4938(3) 0.052(4) Uiso 1 1 d G . . 
H121 H 0.5645 0.5615 0.4546 0.062 Uiso 1 1 calc R . . 
C122 C 0.6442(5) 0.4312(10) 0.5068(4) 0.060(5) Uiso 1 1 d G . . 
H122 H 0.6524 0.3835 0.4763 0.072 Uiso 1 1 calc R . . 
C123 C 0.6846(5) 0.3959(10) 0.5654(5) 0.042(6) Uiso 1 1 d G . . 
H123 H 0.7198 0.3246 0.5740 0.051 Uiso 1 1 calc R . . 
C124 C 0.6723(5) 0.4673(12) 0.6110(3) 0.035(5) Uiso 1 1 d G . . 
H124 H 0.6993 0.4437 0.6501 0.042 Uiso 1 1 calc R . . 
C210 C 0.9015(11) 1.165(3) 0.9097(10) 0.042(6) Uani 1 1 d U . . 
H210 H 0.9207 1.2451 0.9333 0.050 Uiso 1 1 calc R . . 
C211 C 0.9210(13) 1.140(2) 0.8615(13) 0.052(8) Uani 1 1 d . . . 
H211 H 0.9492 1.2041 0.8502 0.063 Uiso 1 1 calc R . . 
C212 C 0.8948(11) 1.007(3) 0.8301(9) 0.037(6) Uani 1 1 d . . . 
C213 C 0.6706(11) 0.929(2) 0.8063(9) 0.029(6) Uani 1 1 d . . . 
C214 C 0.6396(12) 0.994(3) 0.8437(11) 0.048(7) Uani 1 1 d . . . 
H214 H 0.6279 0.9366 0.8701 0.057 Uiso 1 1 calc R . . 
C215 C 0.6260(13) 1.143(2) 0.8421(11) 0.044(6) Uani 1 1 d . . . 
H215 H 0.6037 1.1822 0.8661 0.052 Uiso 1 1 calc R . . 
C216 C 0.6747(11) 1.171(2) 0.7691(10) 0.033(6) Uani 1 1 d . . . 
H216 H 0.6874 1.2308 0.7437 0.040 Uiso 1 1 calc R . . 
C217 C 0.6868(10) 1.021(2) 0.7677(9) 0.032(5) Uani 1 1 d . . . 
H217 H 0.7056 0.9838 0.7411 0.038 Uiso 1 1 calc R . . 
C218 C 0.5681(9) 0.652(2) 0.8065(9) 0.023(5) Uani 1 1 d U . . 
H21A H 0.5379 0.6103 0.7688 0.027 Uiso 1 1 calc R . . 
H21B H 0.5504 0.7484 0.8086 0.027 Uiso 1 1 calc R . . 
C219 C 0.5615(6) 0.5612(11) 0.8560(4) 0.036(5) Uiso 1 1 d G . . 
C220 C 0.5016(6) 0.4725(13) 0.8439(4) 0.047(6) Uiso 1 1 d G . . 
H220 H 0.4672 0.4673 0.8056 0.056 Uiso 1 1 calc R . . 
C221 C 0.4931(5) 0.3915(11) 0.8889(5) 0.065(8) Uiso 1 1 d G . . 
H221 H 0.4530 0.3321 0.8808 0.078 Uiso 1 1 calc R . . 
C222 C 0.5446(6) 0.3992(10) 0.9461(5) 0.048(4) Uiso 1 1 d G . . 
H222 H 0.5389 0.3450 0.9762 0.058 Uiso 1 1 calc R . . 
C223 C 0.6045(5) 0.4880(10) 0.9582(3) 0.053(4) Uiso 1 1 d G . . 
H223 H 0.6390 0.4931 0.9965 0.064 Uiso 1 1 calc R . . 
C224 C 0.6130(5) 0.5689(9) 0.9132(4) 0.049(4) Uiso 1 1 d G . . 
H224 H 0.6531 0.6283 0.9213 0.059 Uiso 1 1 calc R . . 
  
loop_ 
 _atom_site_aniso_label 
 _atom_site_aniso_U_11 
 _atom_site_aniso_U_22 
 _atom_site_aniso_U_33 
 _atom_site_aniso_U_23 
 _atom_site_aniso_U_13 
 _atom_site_aniso_U_12 
Br1 0.121(3) 0.071(2) 0.048(2) 0.0274(19) 0.043(2) 0.017(2) 
Br2 0.140(3) 0.072(2) 0.048(2) -0.032(2) 0.038(2) -0.023(2) 
N11 0.032(7) 0.008(6) 0.021(6) 0.004(4) 0.008(5) 0.002(5) 
N12 0.082(11) 0.015(6) 0.032(7) 0..000(5) 0.014(6) -0.008(5) 
N21 0.038(5) 0.037(5) 0.037(5) -0.002(2) 0.013(3) 0.001(2) 
N22 0.033(5) 0.032(5) 0.033(5) 0.000(2) 0.013(3) 0.001(2) 
O11 0.077(12) 0.044(11) 0.032(9) 0.001(8) 0.020(8) -0.015(8) 
O12 0.043(4) 0.046(4) 0.043(4) -0.0022(19) 0.021(2) 0.0017(19) 
O21 0.042(9) 0.031(9) 0.044(10) -0.008(8) 0.037(8) -0.009(7) 
O22 0.067(5) 0.068(5) 0.068(5) 0.0033(19) 0.029(3) -0.0029(19) 
C11 0.019(5) 0.019(5) 0.019(5) 0.000(2) 0.008(3) 0.000(2) 
C12 0.027(6) 0.028(6) 0.027(6) -0.001(2) 0.011(3) 0.000(2) 
C13 0.027(5) 0.025(5) 0.025(5) -0.0003(19) 0.010(3) 0.0009(19) 
C14 0.023(5) 0.022(5) 0.024(5) -0.001(2) 0.008(3) 0.000(2) 
C15 0.087(13) 0.031(10) 0.046(10) 0.009(6) 0.027(8) -0.006(7) 
C16 0.026(5) 0.026(6) 0.026(6) 0.000(2) 0.010(3) 0.000(2) 
C17 0.027(6) 0.027(6) 0.027(6) 0.000(2) 0.010(3) 0.000(2) 
C18 0.034(6) 0.034(6) 0.033(6) -0.001(2) 0.012(3) 0.000(2) 
C19 0.032(11) 0.039(14) 0.019(9) 0.014(9) -0.003(8) 0.020(9) 
C21 0.044(10) 0.032(10) 0.037(9) -0.002(6) 0.018(7) 0.010(7) 
C22 0.044(10) 0.014(7) 0.012(7) 0.004(4) 0.015(6) 0.003(5) 
C23 0.022(5) 0.020(5) 0.019(5) 0.0015(19) 0.008(3) -0.0020(19) 
C24 0.046(11) 0.025(8) 0.019(7) 0.004(5) 0.020(7) 0.006(6) 
C25 0.026(5) 0.025(5) 0.026(5) 0.000(2) 0.010(2) 0.000(2) 
C26 0.039(10) 0.041(10) 0.022(7) 0.010(6) 0.019(6) 0.022(6) 
C27 0.038(9) 0.026(9) 0.033(9) 0.016(6) 0.016(6) 0.002(6) 
C28 0.055(11) 0.022(8) 0.020(7) 0.004(5) 0.018(6) 0.005(6) 
C29 0.064(14) 0.034(14) 0.079(15) 0.032(11) 0.058(12) 0.012(10) 
C110 0.067(13) 0.034(10) 0.051(12) -0.007(8) -0.025(8) 0.009(8) 
C111 0.047(7) 0.047(7) 0.047(7) 0.000(2) 0.017(3) 0.000(2) 
C112 0.042(12) 0.038(13) 0.066(13) -0.014(10) 0.049(11) -0.014(10) 
C113 0.044(13) 0.011(11) 0.032(14) 0.010(10) 0.017(11) -0.007(9) 
C114 0.020(5) 0.019(5) 0.020(5) -0.001(2) 0.007(2) 0.001(2) 
C115 0.035(6) 0.034(6) 0.035(6) 0.000(2) 0.013(3) 0.000(2) 
C116 0.033(6) 0.032(6) 0.032(6) 0.001(2) 0.013(3) -0.001(2) 
C117 0.026(5) 0.026(5) 0.026(5) 0.000(2) 0.010(3) 0.000(2) 
C118 0.043(7) 0.041(7) 0.043(7) -0.0012(19) 0.016(3) 0.001(2) 
C210 0.042(6) 0.041(6) 0.042(6) 0.000(2) 0.015(3) 0.001(2) 
C211 0.055(11) 0.028(9) 0.067(14) 0.012(7) 0.015(8) -0.013(7) 
C212 0.045(12) 0.047(14) 0.017(8) 0.008(8) 0.007(8) -0.002(10) 
C213 0.021(11) 0.048(15) 0.016(11) 0.006(10) 0.005(9) -0.010(10) 
C214 0.069(12) 0.030(9) 0.054(11) 0.013(7) 0.035(9) 0.009(7) 
C215 0.069(13) 0.020(9) 0.035(8) -0.007(6) 0.011(8) -0.003(8) 
C216 0.043(9) 0.019(8) 0.033(9) 0.010(6) 0.008(7) -0.009(6) 
C217 0.040(10) 0.024(8) 0.032(9) -0.001(6) 0.013(7) 0.005(6) 
C218 0.023(5) 0.021(5) 0.024(5) 0.0017(19) 0.008(3) -0.0006(19) 
  
_geom_special_details 
; 
 All esds (except the esd in the dihedral angle between two l.s. planes) 
 are estimated using the full covariance matrix.  The cell esds are taken 
 into account individually in the estimation of esds in distances, angles 
 and torsion angles; correlations between esds in cell parameters are only 
 used when they are defined by crystal symmetry.  An approximate (isotropic) 
 treatment of cell esds is used for estimating esds involving l.s. planes. 
; 
  
loop_ 
 _geom_bond_atom_site_label_1 
 _geom_bond_atom_site_label_2 
 _geom_bond_distance 
 _geom_bond_site_symmetry_2 
 _geom_bond_publ_flag 
Br1 C19 1.95(2) . ? 
Br2 C29 1.81(2) . ? 
N11 C14 1.35(3) . ? 
N11 C11 1.40(2) . ? 
N11 H11N 0.960(2) . ? 
N12 C116 1.30(3) . ? 
N12 C115 1.36(3) . ? 
N21 C21 1.32(3) . ? 
N21 C24 1.42(3) . ? 
N21 H21N 0.960(2) . ? 
N22 C216 1.33(3) . ? 
N22 C215 1.39(3) . ? 
O11 C16 1.31(2) . ? 
O12 C112 1.32(2) . ? 
O12 H12 0.8200 . ? 
O21 C26 1.19(2) . ? 
O22 C212 1.37(2) . ? 
O22 H22 0.8200 . ? 
C11 C12 1.41(3) . ? 
C11 C15 1.52(3) . ? 
C12 C16 1.43(3) . ? 
C12 C13 1.48(3) . ? 
C13 C14 1.31(3) . ? 
C13 C113 1.50(3) . ? 
C14 C118 1.55(3) . ? 
C15 H15A 0.9600 . ? 
C15 H15B 0.9600 . ? 
C15 H15C 0.9600 . ? 
C16 C17 1.49(3) . ? 
C17 C18 1.36(3) . ? 
C17 C112 1.47(3) . ? 
C18 C19 1.42(2) . ? 
C18 H18 0.9300 . ? 
C19 C110 1.32(3) . ? 
C21 C22 1.43(3) . ? 
C21 C25 1.47(2) . ? 
C22 C23 1.41(2) . ? 
C22 C26 1.44(3) . ? 
C23 C24 1.44(3) . ? 
C23 C213 1.46(3) . ? 
C24 C218 1.42(3) . ? 
C25 H25A 0.9600 . ? 
C25 H25B 0.9600 . ? 
C25 H25C 0.9600 . ? 
C26 C27 1.52(3) . ? 
C27 C212 1.31(3) . ? 
C27 C28 1.43(3) . ? 
C28 C29 1.39(3) . ? 
C28 H28 0.9300 . ? 
C29 C210 1.40(3) . ? 
C110 C111 1.39(3) . ? 
C110 H110 0.9300 . ? 
C111 C112 1.39(3) . ? 
C111 H111 0.9300 . ? 
C113 C117 1.38(3) . ? 
C113 C114 1.41(3) . ? 
C114 C115 1.36(3) . ? 
C114 H114 0.9300 . ? 
C115 H115 0.9300 . ? 
C116 C117 1.40(3) . ? 
C116 H116 0.9300 . ? 
C117 H117 0.9300 . ? 
C118 C119 1.54(2) . ? 
C118 H11A 0.9700 . ? 
C118 H11B 0.9700 . ? 
C119 C120 1.3900 . ? 
C119 C124 1.3900 . ? 
C120 C121 1.3900 . ? 
C120 H120 0.9300 . ? 
C121 C122 1.3900 . ? 
C121 H121 0.9300 . ? 
C122 C123 1.3900 . ? 
C122 H122 0.9300 . ? 
C123 C124 1.3900 . ? 
C123 H123 0.9300 . ? 
C124 H124 0.9300 . ? 
C210 C211 1.39(3) . ? 
C210 H210 0.9300 . ? 
C211 C212 1.44(3) . ? 
C211 H211 0.9300 . ? 
C213 C217 1.39(3) . ? 
C213 C214 1.41(3) . ? 
C214 C215 1.40(3) . ? 
C214 H214 0.9300 . ? 
C215 H215 0.9300 . ? 
C216 C217 1.41(3) . ? 
C216 H216 0.9300 . ? 
C217 H217 0.9300 . ? 
C218 C219 1.51(2) . ? 
C218 H21A 0.9700 . ? 
C218 H21B 0.9700 . ? 
C219 C220 1.3900 . ? 
C219 C224 1.3900 . ? 
C220 C221 1.3900 . ? 
C220 H220 0.9300 . ? 
C221 C222 1.3900 . ? 
C221 H221 0.9300 . ? 
C222 C223 1.3900 . ? 
C222 H222 0.9300 . ? 
C223 C224 1.3900 . ? 
C223 H223 0.9300 . ? 
C224 H224 0.9300 . ? 
  
loop_ 
 _geom_angle_atom_site_label_1 
 _geom_angle_atom_site_label_2 
 _geom_angle_atom_site_label_3 
 _geom_angle 
 _geom_angle_site_symmetry_1 
 _geom_angle_site_symmetry_3 
 _geom_angle_publ_flag 
C14 N11 C11 106.9(16) . . ? 
C14 N11 H11N 133(6) . . ? 
C11 N11 H11N 120(6) . . ? 
C116 N12 C115 114(2) . . ? 
C21 N21 C24 116.4(19) . . ? 
C21 N21 H21N 134(7) . . ? 
C24 N21 H21N 109(7) . . ? 
C216 N22 C215 118.4(19) . . ? 
C112 O12 H12 109.5 . . ? 
C212 O22 H22 109.5 . . ? 
N11 C11 C12 106.3(16) . . ? 
N11 C11 C15 121.0(17) . . ? 
C12 C11 C15 132.6(17) . . ? 
C11 C12 C16 123.2(18) . . ? 
C11 C12 C13 107.6(16) . . ? 
C16 C12 C13 129.2(19) . . ? 
C14 C13 C12 103.1(17) . . ? 
C14 C13 C113 129.0(18) . . ? 
C12 C13 C113 126.0(17) . . ? 
C13 C14 N11 115.9(17) . . ? 
C13 C14 C118 128(2) . . ? 
N11 C14 C118 116.1(18) . . ? 
C11 C15 H15A 109.5 . . ? 
C11 C15 H15B 109.5 . . ? 
H15A C15 H15B 109.5 . . ? 
C11 C15 H15C 109.5 . . ? 
H15A C15 H15C 109.5 . . ? 
H15B C15 H15C 109.5 . . ? 
O11 C16 C12 122.2(19) . . ? 
O11 C16 C17 116.4(18) . . ? 
C12 C16 C17 121.3(19) . . ? 
C18 C17 C112 121(2) . . ? 
C18 C17 C16 120.2(19) . . ? 
C112 C17 C16 118(2) . . ? 
C17 C18 C19 117(2) . . ? 
C17 C18 H18 121.4 . . ? 
C19 C18 H18 121.4 . . ? 
C110 C19 C18 123(2) . . ? 
C110 C19 Br1 122.4(17) . . ? 
C18 C19 Br1 114.4(15) . . ? 
N21 C21 C22 106.8(18) . . ? 
N21 C21 C25 124(2) . . ? 
C22 C21 C25 129(2) . . ? 
C23 C22 C21 104.9(17) . . ? 
C23 C22 C26 135.1(19) . . ? 
C21 C22 C26 119.9(19) . . ? 
C22 C23 C24 112.7(17) . . ? 
C22 C23 C213 123.5(16) . . ? 
C24 C23 C213 123.8(16) . . ? 
C218 C24 N21 124.6(19) . . ? 
C218 C24 C23 136.0(19) . . ? 
N21 C24 C23 99.1(17) . . ? 
C21 C25 H25A 109.5 . . ? 
C21 C25 H25B 109.5 . . ? 
H25A C25 H25B 109.5 . . ? 
C21 C25 H25C 109.5 . . ? 
H25A C25 H25C 109.5 . . ? 
H25B C25 H25C 109.5 . . ? 
O21 C26 C22 123(2) . . ? 
O21 C26 C27 118(2) . . ? 
C22 C26 C27 118.9(18) . . ? 
C212 C27 C28 116(2) . . ? 
C212 C27 C26 123(2) . . ? 
C28 C27 C26 121(2) . . ? 
C29 C28 C27 123(2) . . ? 
C29 C28 H28 118.3 . . ? 
C27 C28 H28 118.3 . . ? 
C28 C29 C210 116(2) . . ? 
C28 C29 Br2 122.6(15) . . ? 
C210 C29 Br2 120.7(19) . . ? 
C19 C110 C111 120(2) . . ? 
C19 C110 H110 120.0 . . ? 
C111 C110 H110 120.0 . . ? 
C112 C111 C110 122(2) . . ? 
C112 C111 H111 119.2 . . ? 
C110 C111 H111 119.2 . . ? 
O12 C112 C111 121(2) . . ? 
O12 C112 C17 123(2) . . ? 
C111 C112 C17 116(2) . . ? 
C117 C113 C114 117.0(19) . . ? 
C117 C113 C13 122(2) . . ? 
C114 C113 C13 120.5(17) . . ? 
C115 C114 C113 119.0(19) . . ? 
C115 C114 H114 120.5 . . ? 
C113 C114 H114 120.5 . . ? 
N12 C115 C114 125(2) . . ? 
N12 C115 H115 117.5 . . ? 
C114 C115 H115 117.5 . . ? 
N12 C116 C117 127(2) . . ? 
N12 C116 H116 116.3 . . ? 
C117 C116 H116 116.3 . . ? 
C113 C117 C116 118(2) . . ? 
C113 C117 H117 121.2 . . ? 
C116 C117 H117 121.1 . . ? 
C119 C118 C14 117.6(16) . . ? 
C119 C118 H11A 107.9 . . ? 
C14 C118 H11A 107.9 . . ? 
C119 C118 H11B 107.9 . . ? 
C14 C118 H11B 107.9 . . ? 
H11A C118 H11B 107.2 . . ? 
C120 C119 C124 120.0 . . ? 
C120 C119 C118 119.2(11) . . ? 
C124 C119 C118 120.7(11) . . ? 
C119 C120 C121 120.0 . . ? 
C119 C120 H120 120.0 . . ? 
C121 C120 H120 120.0 . . ? 
C122 C121 C120 120.0 . . ? 
C122 C121 H121 120.0 . . ? 
C120 C121 H121 120.0 . . ? 
C123 C122 C121 120.0 . . ? 
C123 C122 H122 120.0 . . ? 
C121 C122 H122 120.0 . . ? 
C122 C123 C124 120.0 . . ? 
C122 C123 H123 120.0 . . ? 
C124 C123 H123 120.0 . . ? 
C123 C124 C119 120.0 . . ? 
C123 C124 H124 120.0 . . ? 
C119 C124 H124 120.0 . . ? 
C211 C210 C29 123(2) . . ? 
C211 C210 H210 118.6 . . ? 
C29 C210 H210 118.6 . . ? 
C210 C211 C212 116(2) . . ? 
C210 C211 H211 122.2 . . ? 
C212 C211 H211 122.2 . . ? 
C27 C212 O22 123(2) . . ? 
C27 C212 C211 125(2) . . ? 
O22 C212 C211 112(2) . . ? 
C217 C213 C214 116(2) . . ? 
C217 C213 C23 119.0(19) . . ? 
C214 C213 C23 124.8(19) . . ? 
C215 C214 C213 122(2) . . ? 
C215 C214 H214 119.0 . . ? 
C213 C214 H214 119.0 . . ? 
N22 C215 C214 120(2) . . ? 
N22 C215 H215 120.0 . . ? 
C214 C215 H215 120.0 . . ? 
N22 C216 C217 123.3(19) . . ? 
N22 C216 H216 118.3 . . ? 
C217 C216 H216 118.3 . . ? 
C213 C217 C216 120(2) . . ? 
C213 C217 H217 119.9 . . ? 
C216 C217 H217 120.0 . . ? 
C24 C218 C219 112.9(15) . . ? 
C24 C218 H21A 109.0 . . ? 
C219 C218 H21A 109.0 . . ? 
C24 C218 H21B 109.0 . . ? 
C219 C218 H21B 109.0 . . ? 
H21A C218 H21B 107.8 . . ? 
C220 C219 C224 120.0 . . ? 
C220 C219 C218 118.8(10) . . ? 
C224 C219 C218 121.1(10) . . ? 
C219 C220 C221 120.0 . . ? 
C219 C220 H220 120.0 . . ? 
C221 C220 H220 120.0 . . ? 
C220 C221 C222 120.0 . . ? 
C220 C221 H221 120.0 . . ? 
C222 C221 H221 120.0 . . ? 
C223 C222 C221 120.0 . . ? 
C223 C222 H222 120.0 . . ? 
C221 C222 H222 120.0 . . ? 
C224 C223 C222 120.0 . . ? 
C224 C223 H223 120.0 . . ? 
C222 C223 H223 120.0 . . ? 
C223 C224 C219 120.0 . . ? 
C223 C224 H224 120.0 . . ? 
C219 C224 H224 120.0 . . ? 
  
loop_ 
 _geom_torsion_atom_site_label_1 
 _geom_torsion_atom_site_label_2 
 _geom_torsion_atom_site_label_3 
 _geom_torsion_atom_site_label_4 
 _geom_torsion 
 _geom_torsion_site_symmetry_1 
 _geom_torsion_site_symmetry_2 
 _geom_torsion_site_symmetry_3 
 _geom_torsion_site_symmetry_4 
 _geom_torsion_publ_flag 
C14 N11 C11 C12 0(2) . . . . ? 
C14 N11 C11 C15 176.8(18) . . . . ? 
N11 C11 C12 C16 -177(2) . . . . ? 
C15 C11 C12 C16 7(4) . . . . ? 
N11 C11 C12 C13 2(2) . . . . ? 
C15 C11 C12 C13 -174(2) . . . . ? 
C11 C12 C13 C14 -3(2) . . . . ? 
C16 C12 C13 C14 175(2) . . . . ? 
C11 C12 C13 C113 -168.8(18) . . . . ? 
C16 C12 C13 C113 10(3) . . . . ? 
C12 C13 C14 N11 3(2) . . . . ? 
C113 C13 C14 N11 168.3(19) . . . . ? 
C12 C13 C14 C118 -176(2) . . . . ? 
C113 C13 C14 C118 -11(4) . . . . ? 
C11 N11 C14 C13 -2(2) . . . . ? 
C11 N11 C14 C118 177.3(18) . . . . ? 
C11 C12 C16 O11 35(3) . . . . ? 
C13 C12 C16 O11 -144(2) . . . . ? 
C11 C12 C16 C17 -142(2) . . . . ? 
C13 C12 C16 C17 40(3) . . . . ? 
O11 C16 C17 C18 -160.0(19) . . . . ? 
C12 C16 C17 C18 17(3) . . . . ? 
O11 C16 C17 C112 21(3) . . . . ? 
C12 C16 C17 C112 -162(2) . . . . ? 
C112 C17 C18 C19 -1(3) . . . . ? 
C16 C17 C18 C19 -179.5(18) . . . . ? 
C17 C18 C19 C110 5(3) . . . . ? 
C17 C18 C19 Br1 -178.4(16) . . . . ? 
C24 N21 C21 C22 4(3) . . . . ? 
C24 N21 C21 C25 177.3(19) . . . . ? 
N21 C21 C22 C23 -2(2) . . . . ? 
C25 C21 C22 C23 -175(2) . . . . ? 
N21 C21 C22 C26 176(2) . . . . ? 
C25 C21 C22 C26 3(3) . . . . ? 
C21 C22 C23 C24 0(2) . . . . ? 
C26 C22 C23 C24 -177(2) . . . . ? 
C21 C22 C23 C213 -178.8(18) . . . . ? 
C26 C22 C23 C213 4(4) . . . . ? 
C21 N21 C24 C218 171(2) . . . . ? 
C21 N21 C24 C23 -4(2) . . . . ? 
C22 C23 C24 C218 -172(2) . . . . ? 
C213 C23 C24 C218 7(4) . . . . ? 
C22 C23 C24 N21 2(2) . . . . ? 
C213 C23 C24 N21 -179.2(18) . . . . ? 
C23 C22 C26 O21 -142(2) . . . . ? 
C21 C22 C26 O21 41(3) . . . . ? 
C23 C22 C26 C27 38(3) . . . . ? 
C21 C22 C26 C27 -139(2) . . . . ? 
O21 C26 C27 C212 16(3) . . . . ? 
C22 C26 C27 C212 -163(2) . . . . ? 
O21 C26 C27 C28 -159(2) . . . . ? 
C22 C26 C27 C28 21(3) . . . . ? 
C212 C27 C28 C29 6(3) . . . . ? 
C26 C27 C28 C29 -177.5(19) . . . . ? 
C27 C28 C29 C210 -3(3) . . . . ? 
C27 C28 C29 Br2 -176.0(17) . . . . ? 
C18 C19 C110 C111 -8(4) . . . . ? 
Br1 C19 C110 C111 175.9(16) . . . . ? 
C19 C110 C111 C112 6(4) . . . . ? 
C110 C111 C112 O12 -177(2) . . . . ? 
C110 C111 C112 C17 -2(3) . . . . ? 
C18 C17 C112 O12 174.5(18) . . . . ? 
C16 C17 C112 O12 -7(3) . . . . ? 
C18 C17 C112 C111 -1(3) . . . . ? 
C16 C17 C112 C111 178(2) . . . . ? 
C14 C13 C113 C117 64(3) . . . . ? 
C12 C13 C113 C117 -134(2) . . . . ? 
C14 C13 C113 C114 -123(2) . . . . ? 
C12 C13 C113 C114 39(3) . . . . ? 
C117 C113 C114 C115 3(3) . . . . ? 
C13 C113 C114 C115 -171.1(17) . . . . ? 
C116 N12 C115 C114 -2(3) . . . . ? 
C113 C114 C115 N12 0(3) . . . . ? 
C115 N12 C116 C117 0(4) . . . . ? 
C114 C113 C117 C116 -3(3) . . . . ? 
C13 C113 C117 C116 170.2(19) . . . . ? 
N12 C116 C117 C113 2(3) . . . . ? 
C13 C14 C118 C119 -119(2) . . . . ? 
N11 C14 C118 C119 61(3) . . . . ? 
C14 C118 C119 C120 55(2) . . . . ? 
C14 C118 C119 C124 -127.6(16) . . . . ? 
C124 C119 C120 C121 0.0 . . . . ? 
C118 C119 C120 C121 177.5(12) . . . . ? 
C119 C120 C121 C122 0.0 . . . . ? 
C120 C121 C122 C123 0.0 . . . . ? 
C121 C122 C123 C124 0.0 . . . . ? 
C122 C123 C124 C119 0.0 . . . . ? 
C120 C119 C124 C123 0.0 . . . . ? 
C118 C119 C124 C123 -177.4(13) . . . . ? 
C28 C29 C210 C211 3(3) . . . . ? 
Br2 C29 C210 C211 176.0(17) . . . . ? 
C29 C210 C211 C212 -6(3) . . . . ? 
C28 C27 C212 O22 173.7(17) . . . . ? 
C26 C27 C212 O22 -2(3) . . . . ? 
C28 C27 C212 C211 -9(3) . . . . ? 
C26 C27 C212 C211 175(2) . . . . ? 
C210 C211 C212 C27 9(3) . . . . ? 
C210 C211 C212 O22 -173.6(19) . . . . ? 
C22 C23 C213 C217 41(3) . . . . ? 
C24 C23 C213 C217 -137(2) . . . . ? 
C22 C23 C213 C214 -137(2) . . . . ? 
C24 C23 C213 C214 44(3) . . . . ? 
C217 C213 C214 C215 0(3) . . . . ? 
C23 C213 C214 C215 179(2) . . . . ? 
C216 N22 C215 C214 3(3) . . . . ? 
C213 C214 C215 N22 -3(4) . . . . ? 
C215 N22 C216 C217 -1(3) . . . . ? 
C214 C213 C217 C216 2(3) . . . . ? 
C23 C213 C217 C216 -176.4(18) . . . . ? 
N22 C216 C217 C213 -2(3) . . . . ? 
N21 C24 C218 C219 57(3) . . . . ? 
C23 C24 C218 C219 -131(2) . . . . ? 
C24 C218 C219 C220 -142.1(14) . . . . ? 
C24 C218 C219 C224 40(2) . . . . ? 
C224 C219 C220 C221 0.0 . . . . ? 
C218 C219 C220 C221 -178.0(13) . . . . ? 
C219 C220 C221 C222 0.0 . . . . ? 
C220 C221 C222 C223 0.0 . . . . ? 
C221 C222 C223 C224 0.0 . . . . ? 
C222 C223 C224 C219 0.0 . . . . ? 
C220 C219 C224 C223 0.0 . . . . ? 
C218 C219 C224 C223 178.0(13) . . . . ? 
  
_diffrn_measured_fraction_theta_max    0.994 
_diffrn_reflns_theta_full              26.00 
_diffrn_measured_fraction_theta_full   0.994 
_refine_diff_density_max    0.692 
_refine_diff_density_min   -0.572 
_refine_diff_density_rms    0.090 
